# Supplementary material for: Quality and Specific Concerns of Clinical Guidelines for Integrated Chinese and Western Medicine: A Critical Appraisal
Source: Hindawi journal article supplement (doi:10.1155/2020/9254503), 2020-01-01
Supplement: f1 [file 9254503.f1.pdf]

**Table S1. Search strategy**

| Search strategy in English databases                               | Search strategy in Chinese databases                                |
|--------------------------------------------------------------------|---------------------------------------------------------------------|
| 1. Medicine, Chinese Traditional [MeSH]                            | 1. 医学, 中国传统[主题词] # medicine, traditional Chinese [MeSH]             |
| 2. integrated traditional Chinese [all fields]                     | 2. 中西医结合[主题词] # integrated Chinese and Western medicine [MeSH]      |
| 3. integrative traditional Chinese [all fields]                    | 3. 中西医结合疗法[主题词] # integrated Chinese and Western treatment [MeSH]   |
| 4. integrated Chinese [all fields]                                 | 4. 中医[所有字段] # traditional Chinese medicine [all fields]             |
| 5. integrative Chinese [all fields]                                | 5. 中西医[所有字段] # integrated Chinese and Western medicine [all fields] |
| 6. combination of traditional Chinese and Western [all fields]     | 6. 1 OR 2 OR 3 OR 4 OR 5                                            |
| 7. combination of Chinese and Western [all fields]                 | 7. 指南[主题词] # guideline [MeSH]                                       |
| 8. combination of Chinese traditional and Western [all fields]     | 8. 规范[主题词] # standard [MeSH]                                        |
| 9. 1 OR 2 OR 3 OR 4 OR 5 OR 6 OR 7 OR 8                            | 9. 手册[主题词] # manual [MeSH]                                          |
| 10. Guidelines as Topic [MeSH]                                     | 10. 指南[所有字段] # guideline [all fields]                               |
| 11. guideline [publication type]                                   | 11. 规范[所有字段] # standard [all fields]                                |
| 12. Standard of Care [MeSH]                                        | 12. 手册[所有字段] # manual [all fields]                                  |
| 13. Consensus [MeSH]                                               | 13. 共识[所有字段] # consensus [all fields]                               |
| 14. Manuals as Topic [MeSH]                                        | 14. 推荐[所有字段] # recommendation [all fields]                          |
| 15. manual [MeSH]                                                  | 15. 7 OR 8 OR 9 OR 10 OR 11 OR 12 OR 13 OR 14                       |
| 16. guideline* [all fields]                                        | 16. 6 AND 15                                                        |
| 17. manual* [all fields]                                           |                                                                     |
| 18. consensus* [all fields]                                        |                                                                     |
| 19. handbook* [all fields]                                         |                                                                     |
| 20. recommendation [all fields]                                    |                                                                     |
| 21. 10 OR 11 OR 12 OR 13 OR 14 OR 15 OR 16 OR 17 OR 18 OR 19 OR 20 |                                                                     |
| 22. 9 AND 21                                                       |                                                                     |

Note: Explanations after “#” are the English translation. The medical subject heading terms are only available in the PubMed, EMBASE, and Chinese Bio-medical Literature Database.

**Table S2. Characteristics of Integrated Chinese and Western Medicine Guidelines**

| Topic of guideline                                                | Year | Scope | No. of references | No. of pages | Form of publication | Developer                 | Development method | Involvement of Methodologist | Consensus-building method | Evidence grading system                                              |
|-------------------------------------------------------------------|------|-------|-------------------|--------------|---------------------|---------------------------|--------------------|------------------------------|---------------------------|----------------------------------------------------------------------|
| Acne [25]                                                         | 2015 | T     | 0                 | 6            | CSCD journal        | Non-official organization | CB                 | NR                           | NR                        | No                                                                   |
| Acute fever in children [26]                                      | 2012 | T     | 14                | 4            | Non-CSCD journal    | Non-official organization | CB                 | No                           | NR                        | No                                                                   |
| Acute myocardial infarction [27]                                  | 2018 | D & T | 163               | 13           | CSCD journal        | CMDA                      | EB                 | Yes                          | NR                        | GRADE                                                                |
| Acute pancreatitis [28]                                           | 2017 | D & T | 50                | 9            | Non-CSCD journal    | CAITCWM                   | CB                 | Yes                          | 3 rounds<br>Delphi        | No                                                                   |
| Atherosclerosis [29]                                              | 2017 | D & T | 85                | 5            | Non-CSCD journal    | CAITCWM                   | EB                 | No                           | Delphi                    | No                                                                   |
| Benign prostatic hyperplasia [30]                                 | 2017 | D & T | 39                | 6            | CSCD journal        | CAITCWM                   | EB                 | No                           | NR                        | Highly-credible literatures were selected, without specific criteria |
| Cardiac rehabilitation after coronary artery bypass grafting [31] | 2017 | T     | 33                | 4            | CSCD journal        | CNCC                      | CB                 | Yes                          | NR                        | No                                                                   |
| Cardiopulmonary resuscitation [32]                                | 2007 | T     | 14                | 6            | Non-CSCD journal    | JSSTCM                    | CB                 | NR                           | NR                        | No                                                                   |
| Cerebral infarction [33]                                          | 2018 | D & T | 134               | 9            | CSCD journal        | CAITCWM                   | EB                 | Yes                          | NR                        | Revised Jadad scale*                                                 |
| Children cough [34]                                               | 2010 | D & T | 10                | 5            | CSCD journal        | Non-official organization | CB                 | NR                           | NR                        | No                                                                   |
| Children Mycoplasma pneumonia [35]                                | 2017 | D & T | 38                | 5            | CSCD journal        | CACM                      | CB                 | No                           | NR                        | No                                                                   |
| Cholelithiasis [36]                                               | 2018 | D & T | 35                | 7            | Non-CSCD journal    | CAITCWM                   | CB                 | NR                           | Delphi                    | No                                                                   |

*(Continued Table S2)*

| Topic of guideline                       | Year | Scope | No. of references | No. of pages | Form of publication | Developer | Development method | Involvement of Methodologist | Consensus-building method | Evidence grading system                                                                             |
|------------------------------------------|------|-------|-------------------|--------------|---------------------|-----------|--------------------|------------------------------|---------------------------|-----------------------------------------------------------------------------------------------------|
| Chronic atrophic gastritis [37]          | 2018 | D & T | 92                | 11           | Non-CSCD journal    | CAITCWM   | CB                 | NR                           | 3 rounds<br>Delphi        | No                                                                                                  |
| Chronic cardiac failure [38]             | 2016 | D & T | 50                | 9            | CSCD journal        | CAITCWM   | EB                 | Yes                          | NR                        | Clinical evidence was based on systematical review, without specific criteria                       |
| Chronic gastritis [39]                   | 2012 | D & T | 30                | 6            | CSCD journal        | CAITCWM   | CB                 | NR                           | Meeting                   | No                                                                                                  |
| Chronic non-atrophic gastritis [40]      | 2018 | D & T | 34                | 8            | Non-CSCD journal    | CAITCWM   | CB                 | NR                           | NR                        | No                                                                                                  |
| Chronic prostatitis [41]                 | 2015 | D & T | 66                | 9            | CSCD journal        | CAITCWM   | EB                 | No                           | NR                        | Highly-credible literatures were selected, without specific criteria                                |
| Chronic renal failure [42]               | 2015 | D & T | 7                 | 11           | CSCD journal        | CAITCWM   | CB                 | NR                           | NR                        | No                                                                                                  |
| Community acquired pneumonia [43]        | 2016 | T     | 48                | 6            | Non-CSCD journal    | SHSIM     | CB                 | No                           | NR                        | No                                                                                                  |
| Corticosteroid-dependent dermatitis [44] | 2009 | D & T | 8                 | 2            | CSCD journal        | CMDA      | CB                 | NR                           | NR                        | No                                                                                                  |
| Dyslipidemia [45]                        | 2017 | D & T | 0                 | 7            | Non-CSCD journal    | CAITCWM   | EB                 | NR                           | NR                        | Evidence selection was based on the principal of evidence-based medicine, without specific criteria |
| Eczema [46]                              | 2015 | T     | 17                | 3            | CSCD journal        | CAITCWM   | CB                 | No                           | NR                        | No                                                                                                  |
| Eczema and dermatitis [47]               | 2009 | D & T | 0                 | 1            | Non-CSCD journal    | WASCM     | CB                 | NR                           | NR                        | No                                                                                                  |

*(Continued Table S2)*

| Topic of guideline                    | Year | Scope | No. of references | No. of pages | Form of publication | Developer | Development method | Involvement of Methodologist | Consensus-building method | Evidence grading system                                     |
|---------------------------------------|------|-------|-------------------|--------------|---------------------|-----------|--------------------|------------------------------|---------------------------|-------------------------------------------------------------|
| Erectile dysfunction [48]             | 2016 | D & T | 67                | 7            | CSCD journal        | CAITCWM   | EB                 | No                           | NR                        | Oxford Evidence grading method*                             |
| Functional constipation [49]          | 2018 | D & T | 102               | 9            | Non-CSCD journal    | CAITCWM   | CB                 | Yes                          | Delphi                    | No                                                          |
| Functional dyspepsia [50]             | 2017 | D & T | 31                | 6            | Non-CSCD journal    | CAITCWM   | CB                 | NR                           | Delphi                    | No                                                          |
| Gastroesophageal reflux disease [51]  | 2011 | D & T | 16                | 4            | CSCD journal        | CAITCWM   | CB                 | NR                           | Meeting                   | No                                                          |
| Haemorrhoids [52]                     | 2006 | D & T | 0                 | 3            | CSCD journal        | CMA       | CB                 | NR                           | NR                        | No                                                          |
| Hand-foot-and-mouth disease [53]      | 2010 | D & T | 0                 | 3            | Non-CSCD journal    | MHPRC     | CB                 | NR                           | NR                        | No                                                          |
| Hepatic fibrosis [54]                 | 2017 | D & T | 28                | 6            | Non-CSCD journal    | CAITCWM   | EB                 | NR                           | 3 rounds<br>Delphi        | Evidence grading methods of American Society of Hepatology* |
| Herpes progenitalis [55]              | 2009 | D & T | 0                 | 2            | Non-CSCD journal    | CAITCWM   | CB                 | NR                           | NR                        | No                                                          |
| Human avian influenza [56]            | 2016 | D & T | 37                | 7            | CSCD journal        | CAITCWM   | CB                 | NR                           | NR                        | No                                                          |
| Hypertensive cerebral hemorrhage [57] | 2016 | D & T | 0                 | 8            | Non-CSCD journal    | BJAIM     | EB                 | Yes                          | NR                        | No                                                          |
| IgA nephropathy [58]                  | 2013 | D     | 11                | 7            | Conference paper    | CAITCWM   | CB                 | NR                           | Delphi                    | No                                                          |
| Influenza A virus subtype H1N1 [59]   | 2010 | D & T | 0                 | 5            | Non-CSCD journal    | MHPRC     | CB                 | NR                           | NR                        | No                                                          |
| Irritable bowel syndrome [60]         | 2011 | D & T | 13                | 4            | CSCD journal        | CAITCWM   | CB                 | NR                           | Meeting                   | No                                                          |
| Leucoderma [61]                       | 2009 | T     | 0                 | 2            | CSCD journal        | CAITCWM   | CB                 | NR                           | NR                        | No                                                          |
| Liver cirrhosis [62]                  | 2011 | D & T | 6                 | 3            | Non-CSCD journal    | CAITCWM   | CB                 | NR                           | NR                        | No                                                          |
| Liver cirrhosis with ascites [63]     | 2011 | D & T | 9                 | 4            | CSCD journal        | CAITCWM   | CB                 | NR                           | Meeting                   | No                                                          |

*(Continued Table S2)*

| Topic of guideline                                  | Year | Scope | No. of references | No. of pages | Form of publication | Developer                 | Development method | Involvement of Methodologist | Consensus-building method | Evidence grading system                                       |
|-----------------------------------------------------|------|-------|-------------------|--------------|---------------------|---------------------------|--------------------|------------------------------|---------------------------|---------------------------------------------------------------|
| Male infertility [64]                               | 2015 | D & T | 19                | 5            | CSCD journal        | CAITCWM                   | EB                 | No                           | NR                        | High-quality evidence was selected, without specific criteria |
| Melasma [65]                                        | 2016 | T     | 21                | 4            | CSCD journal        | CAITCWM                   | CB                 | No                           | NR                        | No                                                            |
| Multiple organ dysfunction syndrome in elderly [66] | 2014 | D & T | 26                | 5            | CSCD journal        | CAITCWM                   | CB                 | No                           | NR                        | No                                                            |
| Myelodysplastic syndrome [67]                       | 2013 | T     | 15                | 3            | CSCD journal        | Non-official organization | CB                 | No                           | NR                        | No                                                            |
| Non-alcoholic fatty liver disease [68]              | 2017 | D & T | 27                | 7            | Non-CSCD journal    | CAITCWM                   | CB                 | NR                           | NR                        | No                                                            |
| Osteoarthritis [69]                                 | 2013 | D & T | 0                 | 6            | CSCD journal        | CAITCWM                   | CB                 | NR                           | NR                        | No                                                            |
| Petic ulcer [70]                                    | 2018 | D & T | 48                | 9            | Non-CSCD journal    | CAITCWM                   | CB                 | NR                           | 3 rounds Delphi Meeting   | No                                                            |
| Polycystic ovary syndrome [71]                      | 2017 | D     | 107               | 8            | CSCD journal        | Non-official organization | CB                 | No                           | NR                        | No                                                            |
| Premature ejaculation [72]                          | 2018 | D & T | 38                | 6            | CSCD journal        | CAITCWM                   | CB                 | No                           | NR                        | No                                                            |
| Primary liver cancer [73]                           | 2018 | D & T | 105               | 13           | CSCD journal        | Non-official organization | EB                 | Yes                          | Delphi                    | GRADE                                                         |
| Psoriasis vulgaris [74]                             | 2009 | D & T | 0                 | 1            | Non-CSCD journal    | WASCM                     | CB                 | NR                           | NR                        | No                                                            |
| Psycho-cardiological disease [75]                   | 2017 | D & T | 0                 | 4            | Non-CSCD journal    | CAITCWM                   | CB                 | NR                           | NR                        | No                                                            |
| Recurrent vulvovaginal candidiasis [76]             | 2017 | T     | 24                | 4            | CSCD journal        | CAITCWM                   | EB                 | NR                           | NR                        | No                                                            |
| Rosacea [77]                                        | 2016 | T     | 25                | 4            | CSCD journal        | CAITCWM                   | CB                 | No                           | NR                        | No                                                            |

(Continued Table S2)

| Topic of guideline                                    | Year | Scope | No. of references | No. of pages | Form of publication | Developer | Development method | Involvement of Methodologist | Consensus-building method | Evidence grading system                     |
|-------------------------------------------------------|------|-------|-------------------|--------------|---------------------|-----------|--------------------|------------------------------|---------------------------|---------------------------------------------|
| Sepsis [78]                                           | 2013 | D & T | 9                 | 8            | CSCD journal        | CAITCWM   | CB                 | No                           | NR                        | No                                          |
| Severe acute pancreatitis [79]                        | 2015 | D & T | 18                | 5            | Non-CSCD journal    | CAITCWM   | EB                 | NR                           | NR                        | Criteria of the International Sepsis Forum* |
| Severe acute respiratory syndrome [80]                | 2003 | D & T | 64                | 22           | CSCD journal        | CMA       | EB                 | NR                           | NR                        | No                                          |
| Stage 1 Cardiac rehabilitation [81]                   | 2017 | T     | 17                | 9            | CSCD journal        | CNCC      | CB                 | Yes                          | NR                        | No                                          |
| Syndrome of blood stasis [82]                         | 2011 | D & T | 41                | 6            | CSCD journal        | CAITCWM   | CB                 | Yes                          | Delphi                    | No                                          |
| Ulcerative colitis [83]                               | 2018 | D & T | 48                | 8            | Non-CSCD journal    | CAITCWM   | CB                 | NR                           | NR                        | No                                          |
| Urolithiasis [84]                                     | 2008 | D & T | 0                 | 4            | Non-CSCD journal    | CAITCWM   | CB                 | No                           | NR                        | No                                          |
| Xinmailong injection for chronic cardiac failure [85] | 2016 | T     | 46                | 5            | CSCD journal        | CAITCWM   | CB                 | Yes                          | NR                        | No                                          |
| Zika virus disease [86]                               | 2016 | D & T | 19                | 4            | CSCD journal        | CAITCWM   | CB                 | NR                           | NR                        | No                                          |

Abbreviations: BJAIM=Beijing Association of Integrative Medicine; CACM=China Association of Chinese Medicine; ; CAITCWM=Chinese Association of the Integration of Traditional Chinese and Western Medicine; CB=consensus-based; CMA=Chinese Medical Association; CMDA=Chinese Medical Doctor Association; CNCC=Chinese National Cardiovascular Center; CSCD=Chinese Science Citation Database; D=diagnosis; EB=evidence-based; GRADE=The Grading of Recommendations Assessment, Development and Evaluation system; JSSTCM=Jiang-Su Society of Traditional Chinese Medicine; MHPRC=Ministry of Health of the People's Republic of China; NR=not reported; SHSIM=Shanghai Society of Integrated Medicine; T=treatment; WASCM=the Whole Army Society of Chinese Medicine

\*: The grade of evidence was only associated with type of studies in the grading system.

**Table S3. Assessment results of AGREE II**

| Topic of guideline                                                | Standardized scores of AGREE II (%) |      |      |      |      |      | Overall assessment |
|-------------------------------------------------------------------|-------------------------------------|------|------|------|------|------|--------------------|
|                                                                   | D1                                  | D2   | D3   | D4   | D5   | D6   |                    |
| Acne [25]                                                         | 76.4                                | 18.1 | 17.2 | 77.8 | 19.4 | 0.0  | C                  |
| Acute fever in children [26]                                      | 37.5                                | 19.4 | 10.4 | 26.4 | 13.9 | 0.0  | C                  |
| Acute myocardial infarction [27]                                  | 94.4                                | 62.5 | 53.1 | 70.8 | 20.8 | 83.3 | B                  |
| Acute pancreatitis [28]                                           | 68.1                                | 23.6 | 32.8 | 40.3 | 58.3 | 0.0  | B                  |
| Atherosclerosis [29]                                              | 70.8                                | 36.1 | 35.9 | 33.3 | 13.9 | 85.4 | B                  |
| Benign prostatic hyperplasia [30]                                 | 66.7                                | 34.7 | 15.6 | 47.2 | 41.7 | 0.0  | B                  |
| Cardiac rehabilitation after coronary artery bypass grafting [31] | 70.8                                | 34.7 | 17.2 | 51.4 | 11.1 | 0.0  | C                  |
| Cardiopulmonary resuscitation [32]                                | 69.4                                | 25.0 | 7.3  | 54.2 | 13.9 | 0.0  | C                  |
| Cerebral infarction [33]                                          | 68.1                                | 34.7 | 57.8 | 63.9 | 30.6 | 85.4 | B                  |
| Children cough [34]                                               | 50.0                                | 16.7 | 10.4 | 31.9 | 15.3 | 0.0  | C                  |
| Children Mycoplasma pneumonia [35]                                | 72.2                                | 22.2 | 14.1 | 45.8 | 20.8 | 0.0  | C                  |
| Cholelithiasis [36]                                               | 54.2                                | 26.4 | 28.1 | 54.2 | 59.7 | 0.0  | C                  |
| Chronic atrophic gastritis [37]                                   | 72.2                                | 25.0 | 27.6 | 55.6 | 63.9 | 0.0  | C                  |
| Chronic cardiac failure [38]                                      | 69.4                                | 48.6 | 29.7 | 69.4 | 30.6 | 0.0  | B                  |
| Chronic gastritis [39]                                            | 56.9                                | 25.0 | 16.7 | 55.6 | 47.2 | 0.0  | C                  |
| Chronic non-atrophic gastritis [40]                               | 48.6                                | 23.6 | 8.3  | 47.2 | 52.8 | 0.0  | C                  |
| Chronic prostatitis [41]                                          | 68.1                                | 22.2 | 18.8 | 58.3 | 51.4 | 0.0  | C                  |
| Chronic renal failure [42]                                        | 75.0                                | 31.9 | 9.9  | 37.5 | 27.8 | 0.0  | C                  |
| Community acquired pneumonia [43]                                 | 55.6                                | 37.5 | 14.1 | 45.8 | 8.3  | 0.0  | C                  |
| Corticosteroid-dependent dermatitis [44]                          | 62.5                                | 9.7  | 7.3  | 38.9 | 11.1 | 0.0  | C                  |
| Dyslipidemia [45]                                                 | 68.1                                | 44.4 | 27.1 | 76.4 | 41.7 | 83.3 | B                  |
| Eczema [46]                                                       | 65.3                                | 19.4 | 15.1 | 30.6 | 26.4 | 0.0  | C                  |
| Eczema and dermatitis [47]                                        | 54.2                                | 18.1 | 3.1  | 36.1 | 26.4 | 0.0  | C                  |
| Erectile dysfunction [48]                                         | 62.5                                | 22.2 | 21.4 | 45.8 | 31.9 | 0.0  | C                  |
| Functional constipation [49]                                      | 55.6                                | 23.6 | 22.9 | 40.3 | 59.7 | 0.0  | C                  |
| Functional dyspepsia [50]                                         | 70.8                                | 29.2 | 30.2 | 61.1 | 48.6 | 0.0  | B                  |
| Gastroesophageal reflux disease [51]                              | 61.1                                | 25.0 | 12.5 | 38.9 | 25.0 | 0.0  | C                  |
| Haemorrhoids [52]                                                 | 62.5                                | 15.3 | 9.9  | 34.7 | 5.6  | 0.0  | C                  |
| Hand-foot-and-mouth disease [53]                                  | 54.2                                | 15.3 | 2.6  | 45.8 | 6.9  | 0.0  | C                  |
| Hepatic fibrosis [54]                                             | 61.1                                | 27.8 | 30.2 | 44.4 | 51.4 | 0.0  | B                  |
| Herpes progenitalis [55]                                          | 70.8                                | 23.6 | 10.4 | 45.8 | 23.6 | 0.0  | C                  |
| Human avian influenza [56]                                        | 43.1                                | 18.1 | 10.4 | 59.7 | 12.5 | 0.0  | C                  |
| Hypertensive cerebral hemorrhage [57]                             | 65.3                                | 18.1 | 21.4 | 52.8 | 19.4 | 0.0  | C                  |
| IgA nephropathy [58]                                              | 69.4                                | 22.2 | 14.6 | 27.8 | 11.1 | 0.0  | C                  |
| Influenza A virus subtype H1N1 [59]                               | 66.7                                | 15.3 | 3.1  | 52.8 | 33.3 | 0.0  | C                  |
| Irritable bowel syndrome [60]                                     | 56.9                                | 22.2 | 17.7 | 40.3 | 23.6 | 0.0  | C                  |
| Leucoderma [61]                                                   | 63.9                                | 13.9 | 7.8  | 45.8 | 15.3 | 0.0  | C                  |
| Liver cirrhosis [62]                                              | 54.2                                | 25.0 | 10.9 | 33.3 | 29.2 | 0.0  | C                  |
| Liver cirrhosis with ascites [63]                                 | 68.1                                | 25.0 | 12.0 | 40.3 | 38.9 | 0.0  | C                  |
| Male infertility [64]                                             | 66.7                                | 33.3 | 9.9  | 34.7 | 12.5 | 0.0  | C                  |

(Continued Table S3)

| Topic of guideline                                    | Standardized scores of AGREE II (%) |      |      |      |      |      | Overall assessment |
|-------------------------------------------------------|-------------------------------------|------|------|------|------|------|--------------------|
|                                                       | D1                                  | D2   | D3   | D4   | D5   | D6   |                    |
| Melasma [65]                                          | 62.5                                | 22.2 | 19.3 | 41.7 | 16.7 | 0.0  | C                  |
| Multiple organ dysfunction syndrome in elderly [66]   | 76.4                                | 20.8 | 8.3  | 48.6 | 16.7 | 0.0  | C                  |
| Myelodysplastic syndrome [67]                         | 37.5                                | 12.5 | 8.9  | 27.8 | 13.9 | 0.0  | C                  |
| Non-alcoholic fatty liver disease [68]                | 36.1                                | 23.6 | 8.9  | 34.7 | 44.4 | 0.0  | C                  |
| Osteoarthritis [69]                                   | 61.1                                | 9.7  | 7.3  | 48.6 | 29.2 | 0.0  | C                  |
| Petic ulcer [70]                                      | 65.3                                | 27.8 | 21.4 | 65.3 | 54.2 | 0.0  | C                  |
| Polycystic ovary syndrome [71]                        | 79.2                                | 36.1 | 22.9 | 43.1 | 13.9 | 85.4 | B                  |
| Premature ejaculation [72]                            | 65.3                                | 25.0 | 18.2 | 38.9 | 20.8 | 0.0  | C                  |
| Primary liver cancer [73]                             | 84.7                                | 66.7 | 85.9 | 73.6 | 65.3 | 100  | A                  |
| Psoriasis vulgaris [74]                               | 48.6                                | 6.9  | 2.1  | 40.3 | 26.4 | 0.0  | C                  |
| Psycho-cardiological disease [75]                     | 70.8                                | 27.8 | 11.5 | 40.3 | 15.3 | 0.0  | C                  |
| Recurrent vulvovaginal candidiasis [76]               | 56.9                                | 26.4 | 27.1 | 58.3 | 16.7 | 0.0  | C                  |
| Rosacea [77]                                          | 45.8                                | 23.6 | 16.7 | 52.8 | 11.1 | 0.0  | C                  |
| Sepsis [78]                                           | 72.2                                | 33.3 | 9.4  | 36.1 | 16.7 | 0.0  | C                  |
| Severe acute pancreatitis [79]                        | 70.8                                | 12.5 | 29.2 | 55.6 | 16.7 | 0.0  | C                  |
| Severe acute respiratory syndrome [80]                | 77.8                                | 37.5 | 21.4 | 73.6 | 65.3 | 0.0  | B                  |
| Stage 1 Cardiac rehabilitation [81]                   | 75.0                                | 38.9 | 20.8 | 61.1 | 43.1 | 0.0  | B                  |
| Syndrome of blood stasis [82]                         | 63.9                                | 18.1 | 19.8 | 31.9 | 9.7  | 0.0  | C                  |
| Ulcerative colitis [83]                               | 52.8                                | 23.6 | 9.4  | 69.4 | 55.6 | 0.0  | C                  |
| Urolithiasis [84]                                     | 58.3                                | 9.7  | 4.7  | 44.4 | 29.2 | 0.0  | C                  |
| Xinmailong injection for chronic cardiac failure [85] | 66.7                                | 48.6 | 29.7 | 38.9 | 43.1 | 0.0  | B                  |
| Zika virus disease [86]                               | 62.5                                | 33.3 | 7.8  | 34.7 | 30.6 | 0.0  | B                  |

**Note:** D1: Scope and purpose; D2: Stakeholder involvement; D3: Rigor of development; D4: Clarity and presentation; D5: Applicability; D6: Editorial independence. Results of overall assessment: A: recommended for use; B: recommend for use after modification; C: Not recommended for use.



**Table S4. Assessment results of IWCM-specific concerns**

| Topic of guideline                                                | Q1  | Q2  | Q3  | Q4  | Q5  | Q6  |
|-------------------------------------------------------------------|-----|-----|-----|-----|-----|-----|
| Acne [25]                                                         | No  | No  | Yes | No  | No  | No  |
| Acute fever in children [26]                                      | Yes | No  | Yes | Yes | No  | No  |
| Acute myocardial infarction [27]                                  | Yes | No  | Yes | No  | No  | No  |
| Acute pancreatitis [28]                                           | Yes | No  | Yes | Yes | No  | Yes |
| Atherosclerosis [29]                                              | No  | No  | Yes | No  | No  | No  |
| Benign prostatic hyperplasia [30]                                 | Yes | No  | No  | No  | No  | No  |
| Cardiac rehabilitation after coronary artery bypass grafting [31] | No  | No  | No  | No  | No  | No  |
| Cardiopulmonary resuscitation [32]                                | No  | No  | Yes | No  | No  | No  |
| Cerebral infarction [33]                                          | No  | No  | Yes | No  | No  | No  |
| Children cough [34]                                               | Yes | Yes | No  | Yes | No  | No  |
| Children Mycoplasma pneumonia [35]                                | No  | Yes | No  | No  | No  | No  |
| Cholelithiasis [36]                                               | Yes | No  | Yes | Yes | No  | Yes |
| Chronic atrophic gastritis [37]                                   | No  | No  | Yes | Yes | No  | Yes |
| Chronic cardiac failure [38]                                      | No  | No  | Yes | No  | No  | No  |
| Chronic gastritis [39]                                            | No  | No  | Yes | Yes | No  | Yes |
| Chronic non-atrophic gastritis [40]                               | Yes | No  | Yes | Yes | No  | Yes |
| Chronic prostatitis [41]                                          | Yes | Yes | No  | Yes | No  | Yes |
| Chronic renal failure [42]                                        | No  | No  | No  | No  | No  | No  |
| Community acquired pneumonia [43]                                 | No  | No  | Yes | No  | No  | No  |
| Corticosteroid-dependent dermatitis [44]                          | Yes | No  | Yes | No  | No  | No  |
| Dyslipidemia [45]                                                 | No  | No  | No  | No  | No  | Yes |
| Eczema [46]                                                       | No  | No  | Yes | No  | No  | No  |
| Eczema and dermatitis [47]                                        | No  | No  | No  | No  | No  | No  |
| Erectile dysfunction [48]                                         | Yes | No  | No  | Yes | No  | No  |
| Functional constipation [49]                                      | Yes | No  | Yes | Yes | No  | Yes |
| Functional dyspepsia [50]                                         | Yes | No  | Yes | Yes | No  | Yes |
| Gastroesophageal reflux disease [51]                              | No  | No  | No  | No  | No  | No  |
| Haemorrhoids [52]                                                 | No  | Yes | No  | No  | No  | No  |
| Hand-foot-and-mouth disease [53]                                  | No  | No  | No  | No  | No  | No  |
| Hepatic fibrosis [54]                                             | Yes | No  | No  | No  | No  | No  |
| Herpes progenitalis [55]                                          | No  | No  | Yes | No  | No  | No  |
| Human avian influenza [56]                                        | No  | No  | Yes | No  | No  | No  |
| Hypertensive cerebral hemorrhage [57]                             | Yes | Yes | Yes | Yes | No  | No  |
| IgA nephropathy [58]                                              | No  | No  | N/A | N/A | N/A | N/A |
| Influenza A virus subtype H1N1 [59]                               | No  | No  | Yes | No  | No  | No  |
| Irritable bowel syndrome [60]                                     | No  | No  | Yes | No  | No  | No  |
| Leucoderma [61]                                                   | No  | No  | No  | No  | No  | No  |
| Liver cirrhosis [62]                                              | Yes | No  | Yes | No  | No  | Yes |
| Liver cirrhosis with ascites [63]                                 | No  | No  | Yes | No  | No  | Yes |
| Male infertility [64]                                             | Yes | No  | No  | No  | No  | No  |

*(Continued Table S4)*

| Topic of guideline                                    | Q1  | Q2  | Q3  | Q4  | Q5  | Q6  |
|-------------------------------------------------------|-----|-----|-----|-----|-----|-----|
| Melasma [65]                                          | No  | No  | No  | No  | No  | No  |
| Multiple organ dysfunction syndrome in elderly [66]   | No  | No  | No  | No  | No  | No  |
| Myelodysplastic syndrome [67]                         | No  | No  | Yes | No  | No  | No  |
| Non-alcoholic fatty liver disease [68]                | Yes | No  | Yes | No  | No  | Yes |
| Osteoarthritis [69]                                   | No  | No  | No  | Yes | No  | No  |
| Petic ulcer [70]                                      | Yes | No  | Yes | Yes | No  | Yes |
| Polycystic ovary syndrome [71]                        | No  | No  | N/A | N/A | N/A | N/A |
| Premature ejaculation [72]                            | Yes | No  | No  | No  | No  | No  |
| Primary liver cancer [73]                             | No  | No  | No  | Yes | No  | No  |
| Psoriasis vulgaris [74]                               | No  | No  | No  | No  | No  | No  |
| Psycho-cardiological disease [75]                     | Yes | No  | Yes | No  | No  | No  |
| Recurrent vulvovaginal candidiasis [76]               | Yes | No  | No  | No  | No  | No  |
| Rosacea [77]                                          | Yes | No  | No  | No  | No  | No  |
| Sepsis [78]                                           | No  | No  | No  | Yes | No  | No  |
| Severe acute pancreatitis [79]                        | No  | No  | No  | No  | No  | No  |
| Severe acute respiratory syndrome [80]                | Yes | Yes | Yes | No  | No  | No  |
| Stage 1 Cardiac rehabilitation [81]                   | No  | Yes | No  | No  | No  | No  |
| Syndrome of blood stasis [82]                         | No  | No  | No  | No  | No  | No  |
| Ulcerative colitis [83]                               | Yes | No  | Yes | Yes | No  | Yes |
| Urolithiasis [84]                                     | No  | Yes | No  | No  | No  | No  |
| Xinmailong injection for chronic cardiac failure [85] | Yes | Yes | No  | No  | No  | No  |
| Zika virus disease [86]                               | No  | No  | Yes | No  | No  | No  |

**Q1:** Whether the CPG included evidence from ancient TCM classics?

**Q2:** Whether the ancient Chinese in the TCM recommendations had been converted to the vernacular for the comprehension of non-TCM practitioners?

**Q3:** Whether the CPG provided the principles of the addition and subtraction of TCM interventions based on syndrome differentiation?

**Q4:** Whether the CPG specified the interactions between TCM and Western medicine?

**Q5:** Whether the CPG ranked the efficacy and safety of different ICWM interventions?

**Q6:** Whether the CPG provided monitoring criteria for both diseases (Western medicine concept) and syndromes (TCM concept)?

**Abbreviations:** ICWM = integrated Chinese and Western medicine; TCM = traditional Chinese medicine; N/A = Not applicable
